# Supplementary material for: Solvent triggered structural diversity of triple-stranded helicates: single molecular magnets
Source: Royal Society of Chemistry journal article supplement (doi:10.1039/c5dt04608d), 2016-01-01
Supplement: c5dt04608d1.pdf [file c5dt04608d1.pdf]

Supporting information for

**Solvent triggered structural diversity of triple-stranded helicates: single  
molecular magnets†**

Hongfeng Li, Peng Chen,\* Wenbin Sun, Lei Zhang and Pengfei Yan\*

Key Laboratory of Functional Inorganic Material Chemistry (MOE), School of Chemistry and Materials Science, Heilongjiang University, Harbin 150080, P.R. China E-mail: jehugu@gmail.com (Chen P.); yanpf@vip.sina.com (Yan P.).

**Table S1** Selected bond lengths for **1–3** (Å).

| <b>1</b> |           |            |           |
|----------|-----------|------------|-----------|
| Dy1–O14  | 2.351(9)  | Dy2–O15    | 2.342(9)  |
| Dy1–O13  | 2.357(9)  | Dy2–O4     | 2.345(10) |
| Dy1–O10  | 2.377(8)  | Dy2–O9     | 2.351(10) |
| Dy1–O5   | 2.385(9)  | Dy2–O8     | 2.374(12) |
| Dy1–O7   | 2.389(11) | Dy2–O11    | 2.392(9)  |
| Dy1–O12  | 2.407(9)  | Dy2–O6     | 2.411(10) |
| Dy1–O17  | 2.444(11) | Dy2–O2     | 2.436(10) |
| Dy1–O3   | 2.489(11) | Dy2–O1     | 2.496(13) |
| <b>2</b> |           |            |           |
| Dy1–O7   | 2.290(5)  | Dy2–O6     | 2.293(5)  |
| Dy1–O3   | 2.351(5)  | Dy2–O1     | 2.297(6)  |
| Dy1–O8   | 2.326(5)  | Dy2–O2     | 2.328(5)  |
| Dy1–O4   | 2.348(5)  | Dy2–O5     | 2.338(5)  |
| Dy1–O11  | 2.348(5)  | Dy2–O13    | 2.576(6)  |
| Dy1–O15  | 2.474(7)  | Dy2–O9     | 2.311(5)  |
| Dy1–O12  | 2.289(6)  | Dy2–O14    | 2.489(5)  |
| Dy1–O16  | 2.484(6)  | Dy2–O10    | 2.336(5)  |
| <b>3</b> |           |            |           |
| Dy1–O1   | 2.293(3)  | Dy2–O3     | 2.297(3)  |
| Dy1–O17  | 2.304(3)  | Dy2–O8     | 2.321(3)  |
| Dy1–O14  | 2.310(3)  | Dy2–O15    | 2.321(3)  |
| Dy1–O7   | 2.327(3)  | Dy2–O12    | 2.323(3)  |
| Dy1–O10  | 2.338(3)  | Dy2–O4     | 2.326(3)  |
| Dy1–O16  | 2.364(3)  | Dy2–O9     | 2.343(3)  |
| Dy1–O5   | 2.418(3)  | Dy2–O2     | 2.425(3)  |
| Dy1–O11  | 2.495(3)  | Dy2–O13_#1 | 2.472(2)  |

Symmetry transformations used to generate equivalent atoms: #1 x-1,y+1,z.

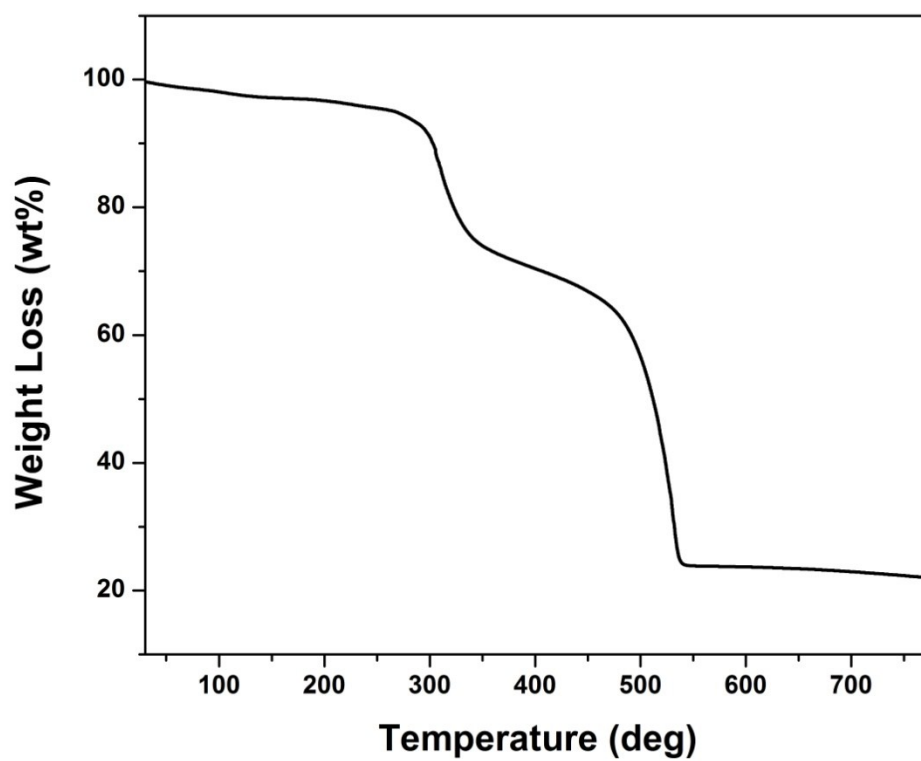

Fig. S1 TG curve of the precipitate  $\text{Dy}_2(\text{BTB})_3(\text{H}_2\text{O})_4$ .

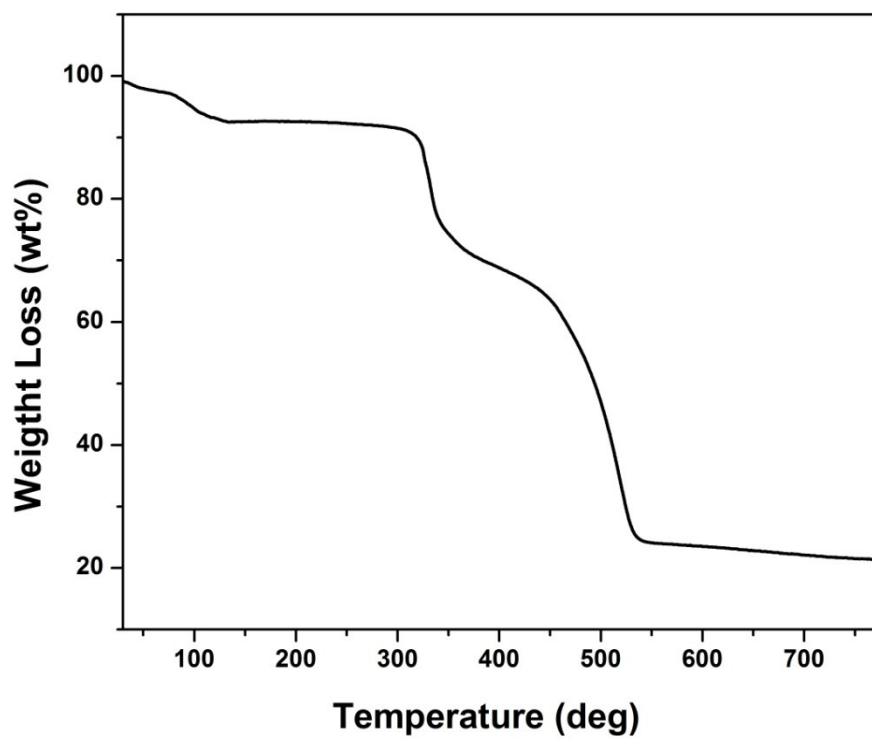

Fig. S2 TG curve of 1.

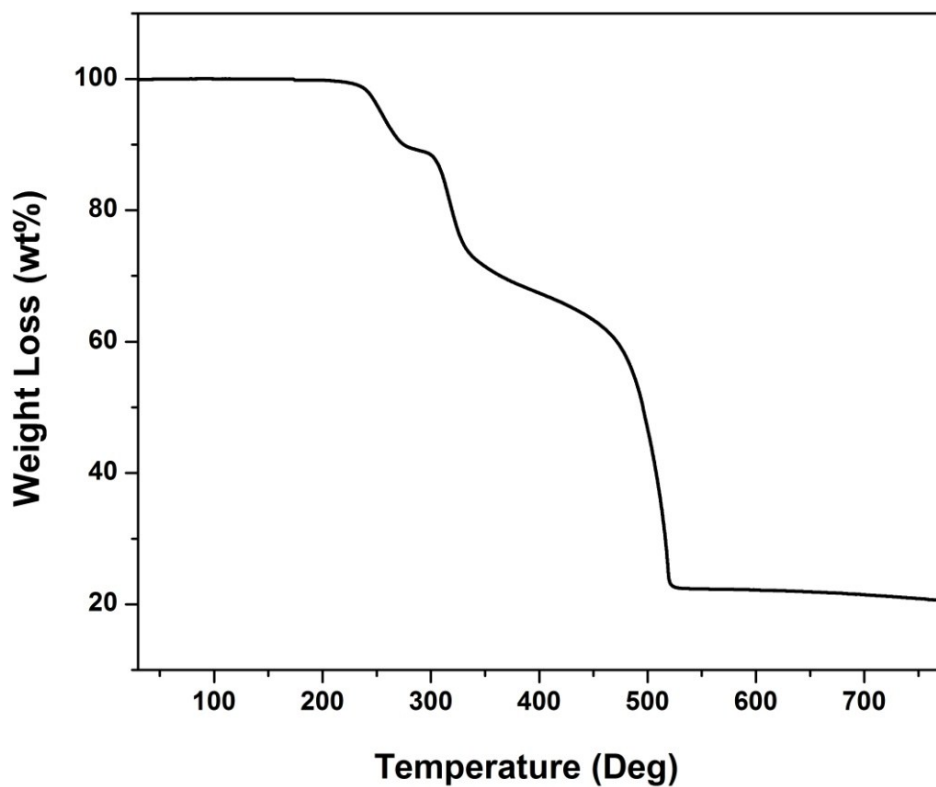

Fig. S3 TG curve of 2.

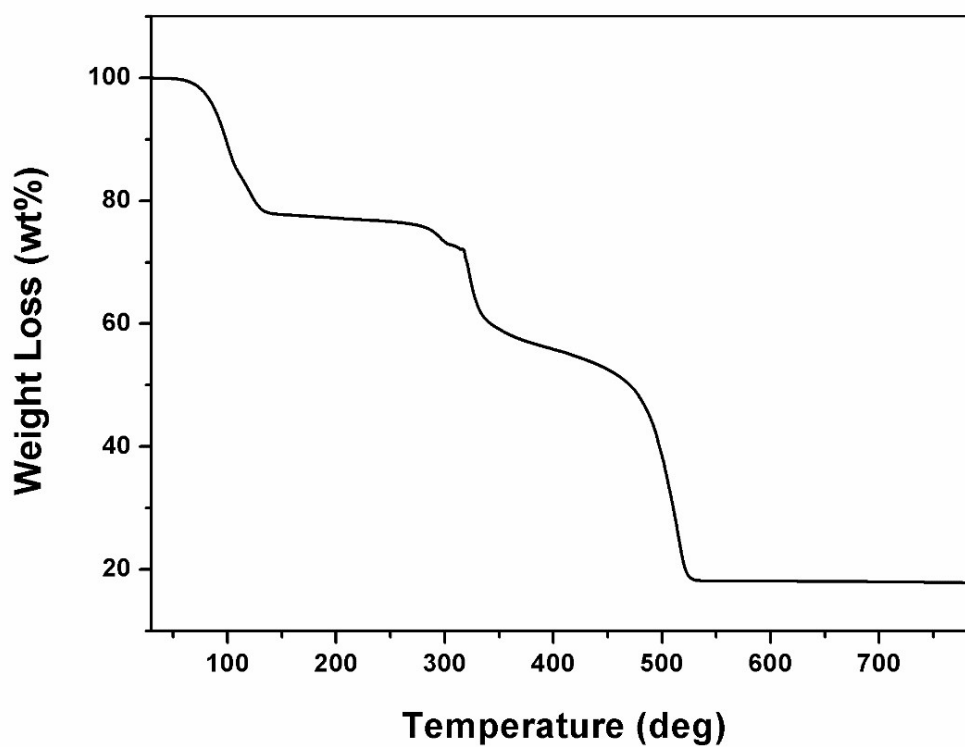

Fig. S4 TG curve of 3.

Crystals of **1–3** have been selected for the thermogravimetric analysis in the experimental range of 30-780 degree, while higher temperature is unavailable because of the limitation of the equipment. TG analysis indicates a total weight loss of 79.66 wt% (calcd. 79.31 wt%) for **1**. The first stage is ascribed to the loss of methanol (found 9.06 wt%, calcd. 8.73 wt%). And the second stage occurring at 300 deg is found for the removal of one ligand until 420 deg (found 24.74 wt%, calcd. 23.35 wt%). And the third stage consequently occurring is ascribed to the removal of the rest two ligands (found 45.86 wt%, calcd. 46.23 wt%). In the case of **2**, a total weight loss of 79.49 wt% (calcd. 79.26 wt%) is observed. The first stage is ascribed to the loss of DME (found 10.31 wt%, calcd. 10.07 wt%). And the second stage occurring at 300 deg is found for the removal of one ligand until 420 deg (found 23.79 wt%, calcd. 23.81 wt%). And the third stage consequently occurring is ascribed to the removal of the rest two ligands (found 45.49 wt%, calcd. 46.62 wt%). In the case of **3**, a total weight loss of 82.13wt% (calcd. 82.49 wt%) is found. The first stage is owing to the removal of 4.5 dioxane molecules (found 18.93 wt%, calcd. 18.61 wt% ) before 140 degree and a further weight loss of 1.36 wt% (calcd. 1.69 wt%) is detected for the two water molecules attached to the Dy<sup>3+</sup> centers until 260 degree. Consequently, a weight loss of 4.66 wt% (calcd. 4.14 wt%) is owing to the removal of a dioxane molecule, which bridges two adjacent helicates. The fourth stage occurring at 300 deg is found for the removal of one ligand until 420 deg (found 18.29 wt%, calcd. 20.10 wt%). And the last stage consequently occurring is ascribed to the removal of the rest two ligands (found 38.89 wt%, calcd. 37.95 wt%).

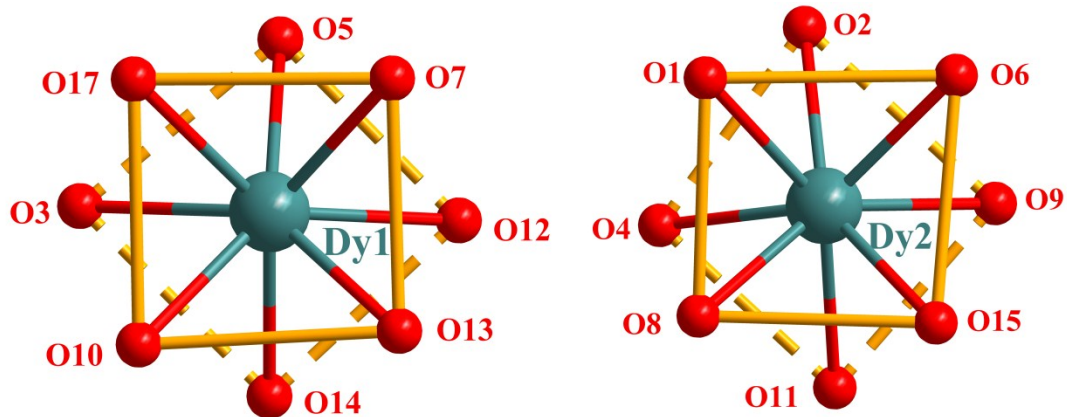

Fig. S5 The coordination geometry of Dy<sup>3+</sup> ions in 1.

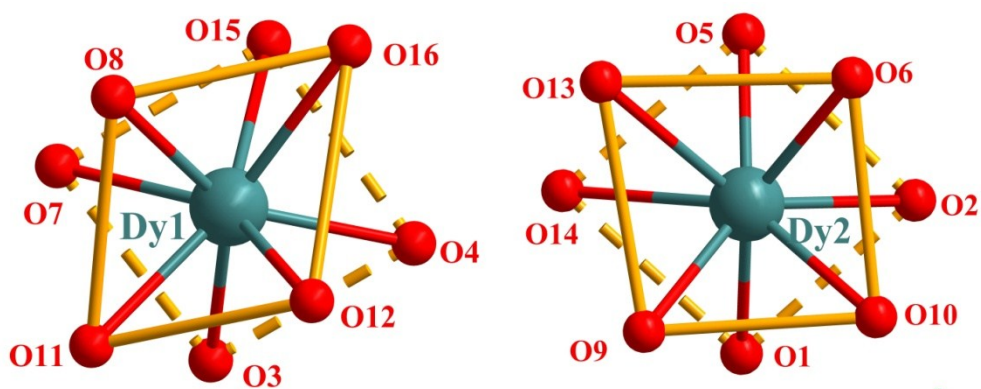

Fig. S6 The coordination geometry of Dy<sup>3+</sup> ions in 2.

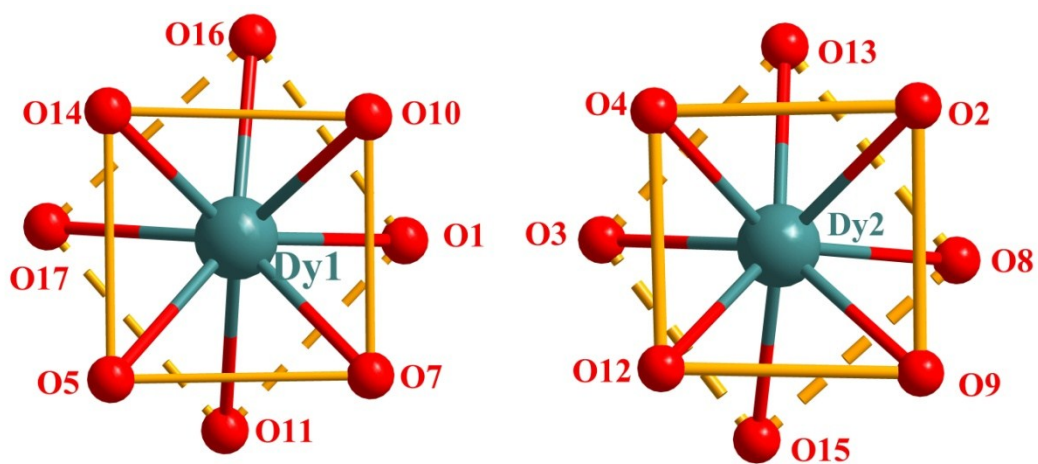

Fig. S7 The coordination geometry of Dy<sup>3+</sup> ions in 3.

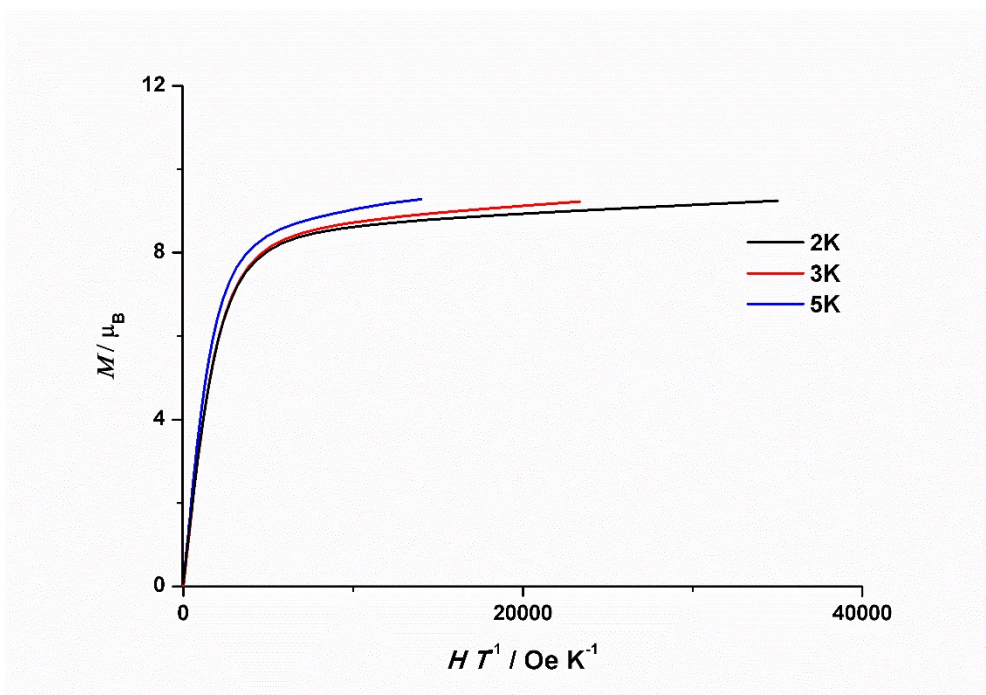

Fig. S8 Magnetization as a function of  $H/T$  for 1.

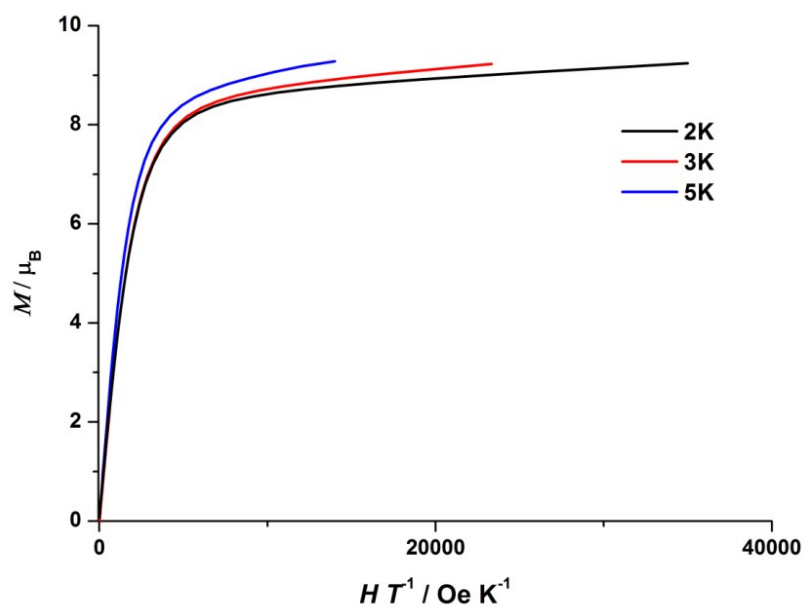

Fig. S9 Magnetization as a function of  $H/T$  for 2.

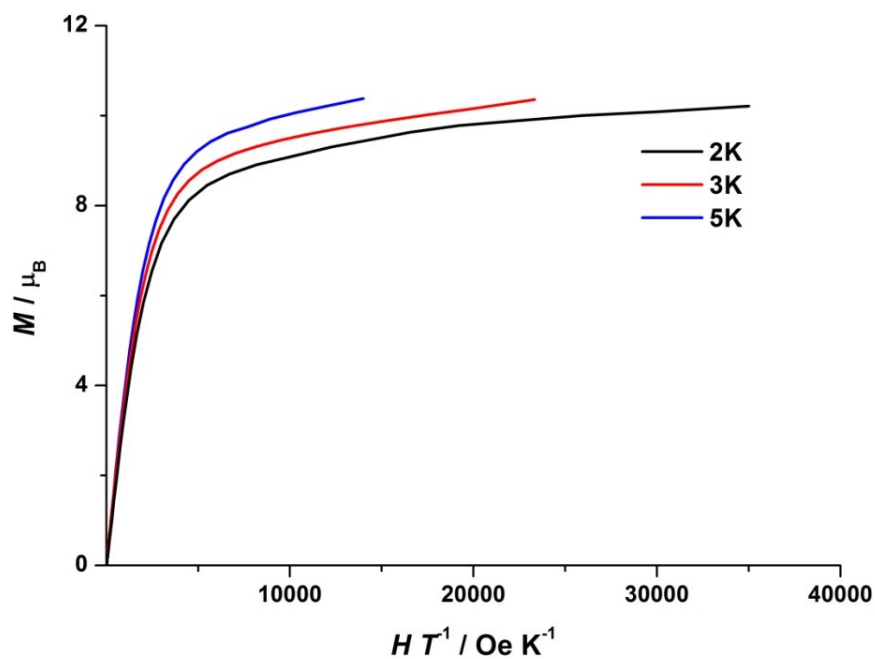

Fig. S10 Magnetization as a function of  $H/T$  for 3.

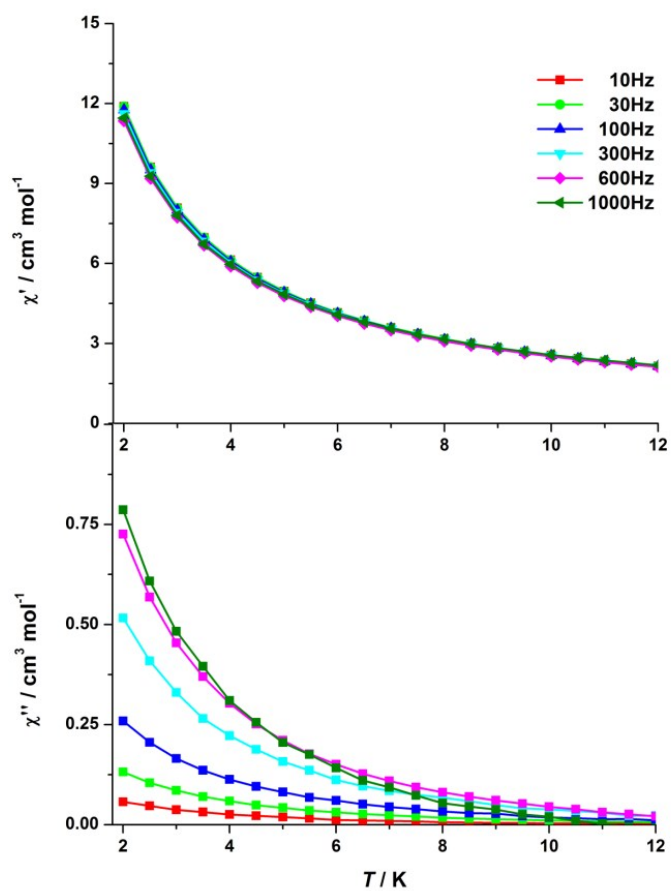

Fig. S11 Temperature dependence of the in-phase ( $\chi'$ , top) and the out-of-phase ( $\chi''$ , bottom) ac susceptibility from 2 to 12 K under zero dc field for 1.



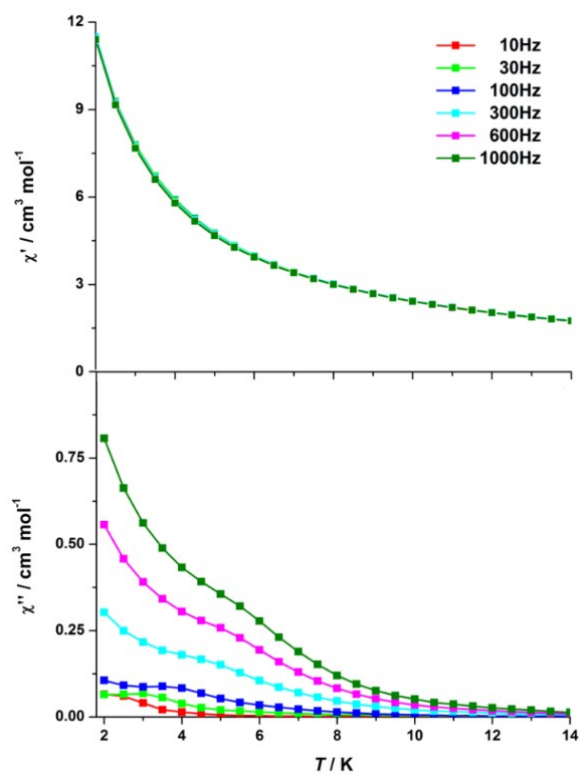

**Fig. S12** Temperature dependence of the in-phase ( $\chi'$ , top) and the out-of-phase ( $\chi''$ , bottom) ac susceptibility from 2 to 14 K under zero dc field for **2**.

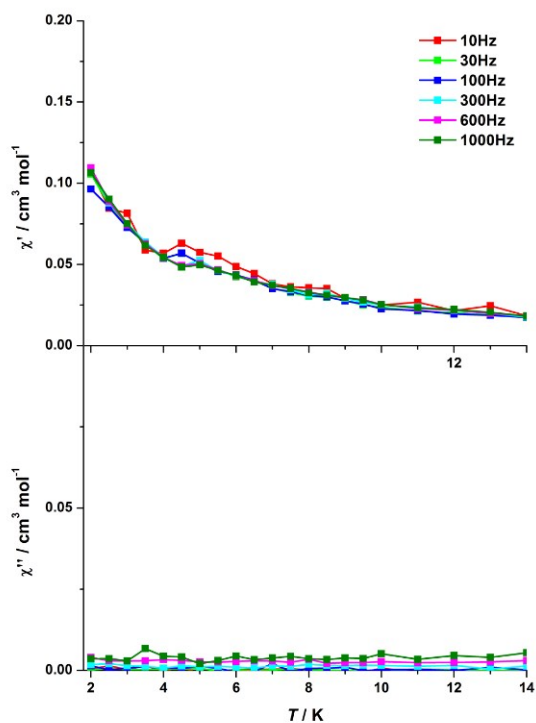

**Fig. S13** Temperature dependence of the in-phase ( $\chi'$ , top) and the out-of-phase ( $\chi''$ , bottom) ac susceptibility from 2 to 12 K under zero dc field for **3**.

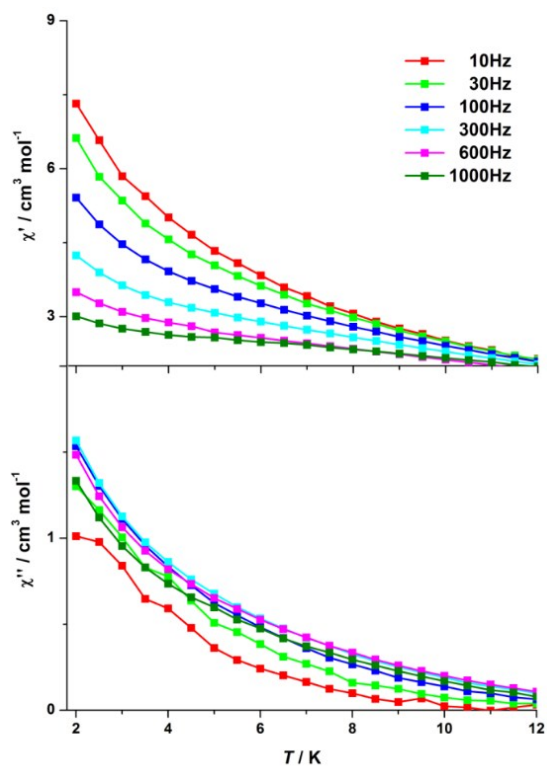

**Fig. S14** Temperature dependence of the in-phase ( $\chi'$ , top) and the out-of-phase ( $\chi''$ , bottom) ac susceptibility from 2 to 12 K under 2000 Oe dc field for **1**.

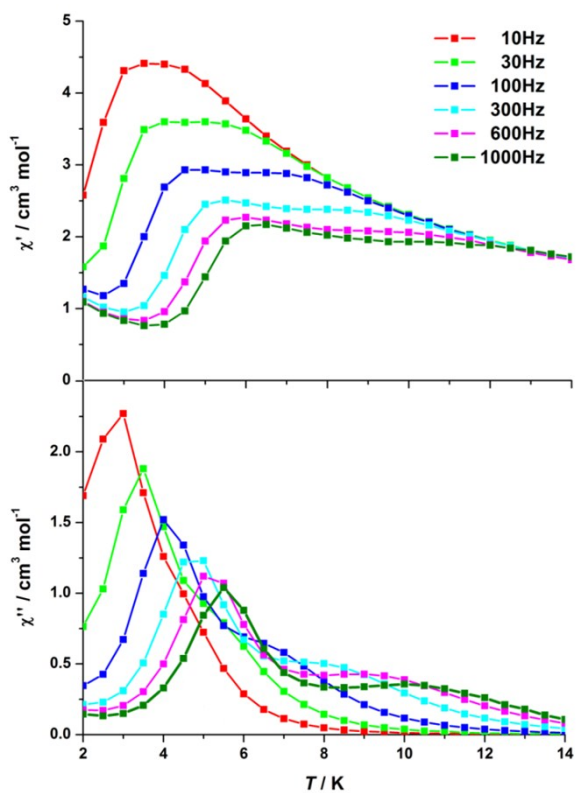

**Fig. S15** Temperature dependence of the in-phase ( $\chi'$ , top) and the out-of-phase ( $\chi''$ , bottom) ac susceptibility from 2 to 14 K under 2000 Oe dc field for **2**.

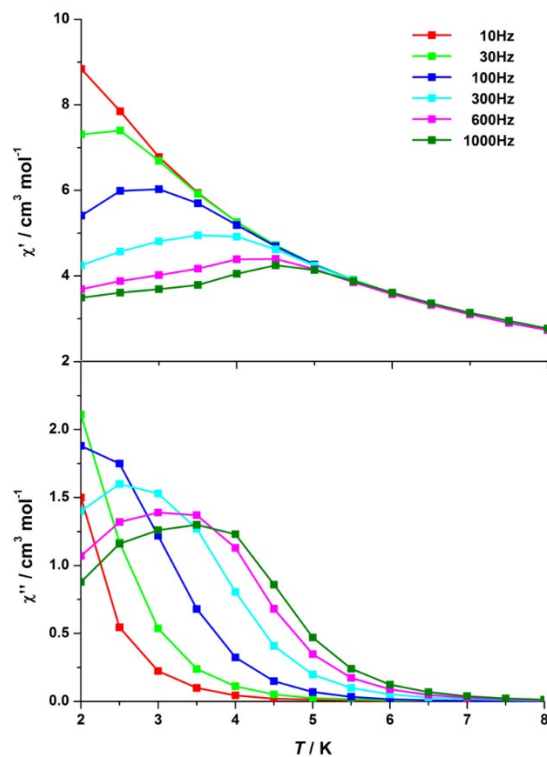

**Fig. S16** Temperature dependence of the in-phase ( $\chi'$ , top) and the out-of-phase ( $\chi''$ , bottom) ac susceptibility from 2 to 8 K under 2000 Oe dc field for **3**.

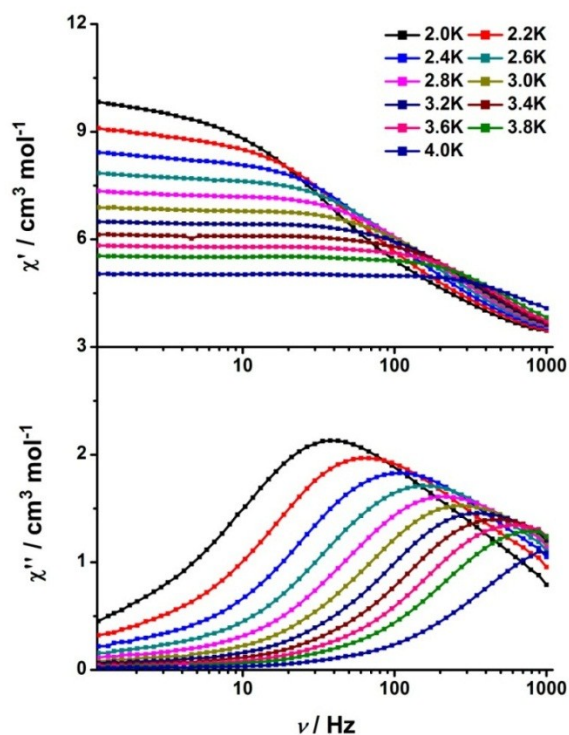

**Fig. S17** Frequency dependence of in-phase ( $\chi'$ , top) and the out-of-phase ( $\chi''$ , bottom) ac magnetic susceptibilities for **3** under an applied field of 2000 Oe in the temperature range of 2–4 K.

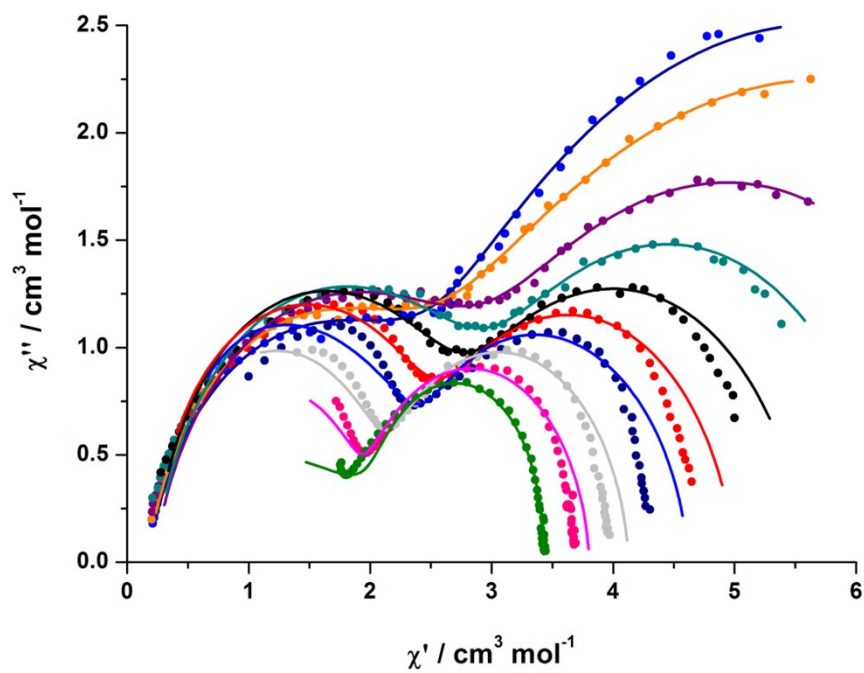

**Fig. S18** Cole-Cole plots using the ac susceptibility data of **2** under an applied field of 2000 Oe (2-6.5 K, 0.5K interval).

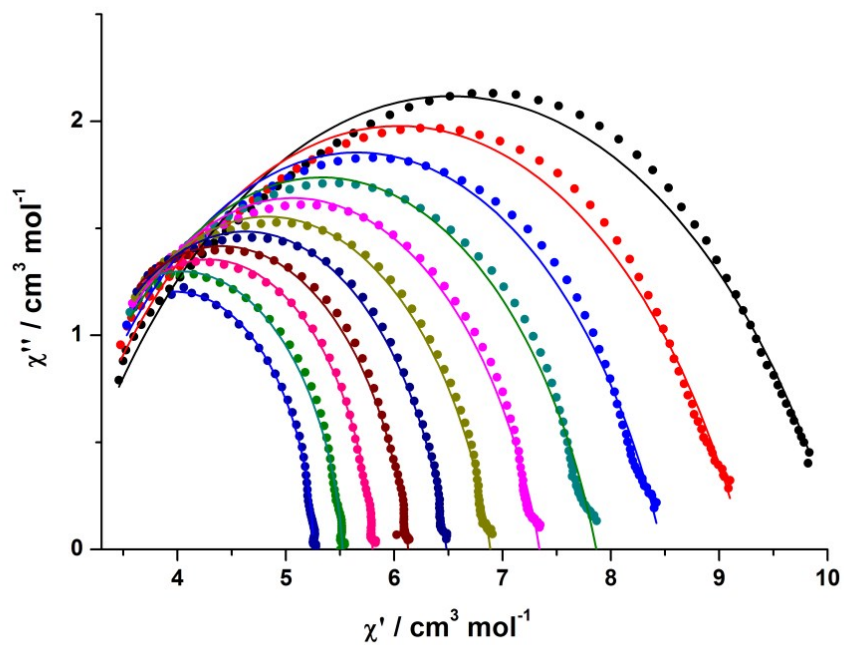

**Fig. S19** Cole-Cole plots using the ac susceptibility data of **3** under an applied field of 2000 Oe (2-4 K, 0.2 K interval).
